# Supplementary material for: Climate Change Scenarios, Their Impacts And Implications On Indian Cardamom-Coffee Hot Spots, One of The Two In The World
Source: Research Square preprint supplement (doi:10.21203/rs.3.rs-745458/v1), 2021-09-07
Supplement: Supplementary file 1 [file f9eb1302cf8e857f262d91c6.docx]

**Article highlights**

- RCP4.5/8.5 scenario analysis showed greater variability in precipitation up to 180% increase and 90% decrease for all hot spots of the southern India
- The scenario analysis predicted extreme variation in temperature levels ranging from 0.5–8.5ºC increase for the entire study region.
- Ecophysiological studies showed that coffee (robusta) would adapt well to future challenging climatic condition closely followed by cardamom and black pepper.
